# Supplementary material for: A quantitative single-cell assay for retrograde membrane traffic enables rapid detection of defects in cellular organization
Source: PubMed Central journal article supplement — Mol Biol Cell. 2020 Mar 19;31(7):511–9. doi: 10.1091/mbc.E19-07-0375 (PMC7202069; doi:10.1091/mbc.e19-07-0375), 2020-03-19
Supplement: mbc-31-511-s001.pdf [file mbc-31-511-s001.pdf]

# Supplemental Materials

*Molecular Biology of the Cell*

Luong et al.

# Supplementary Figure 1

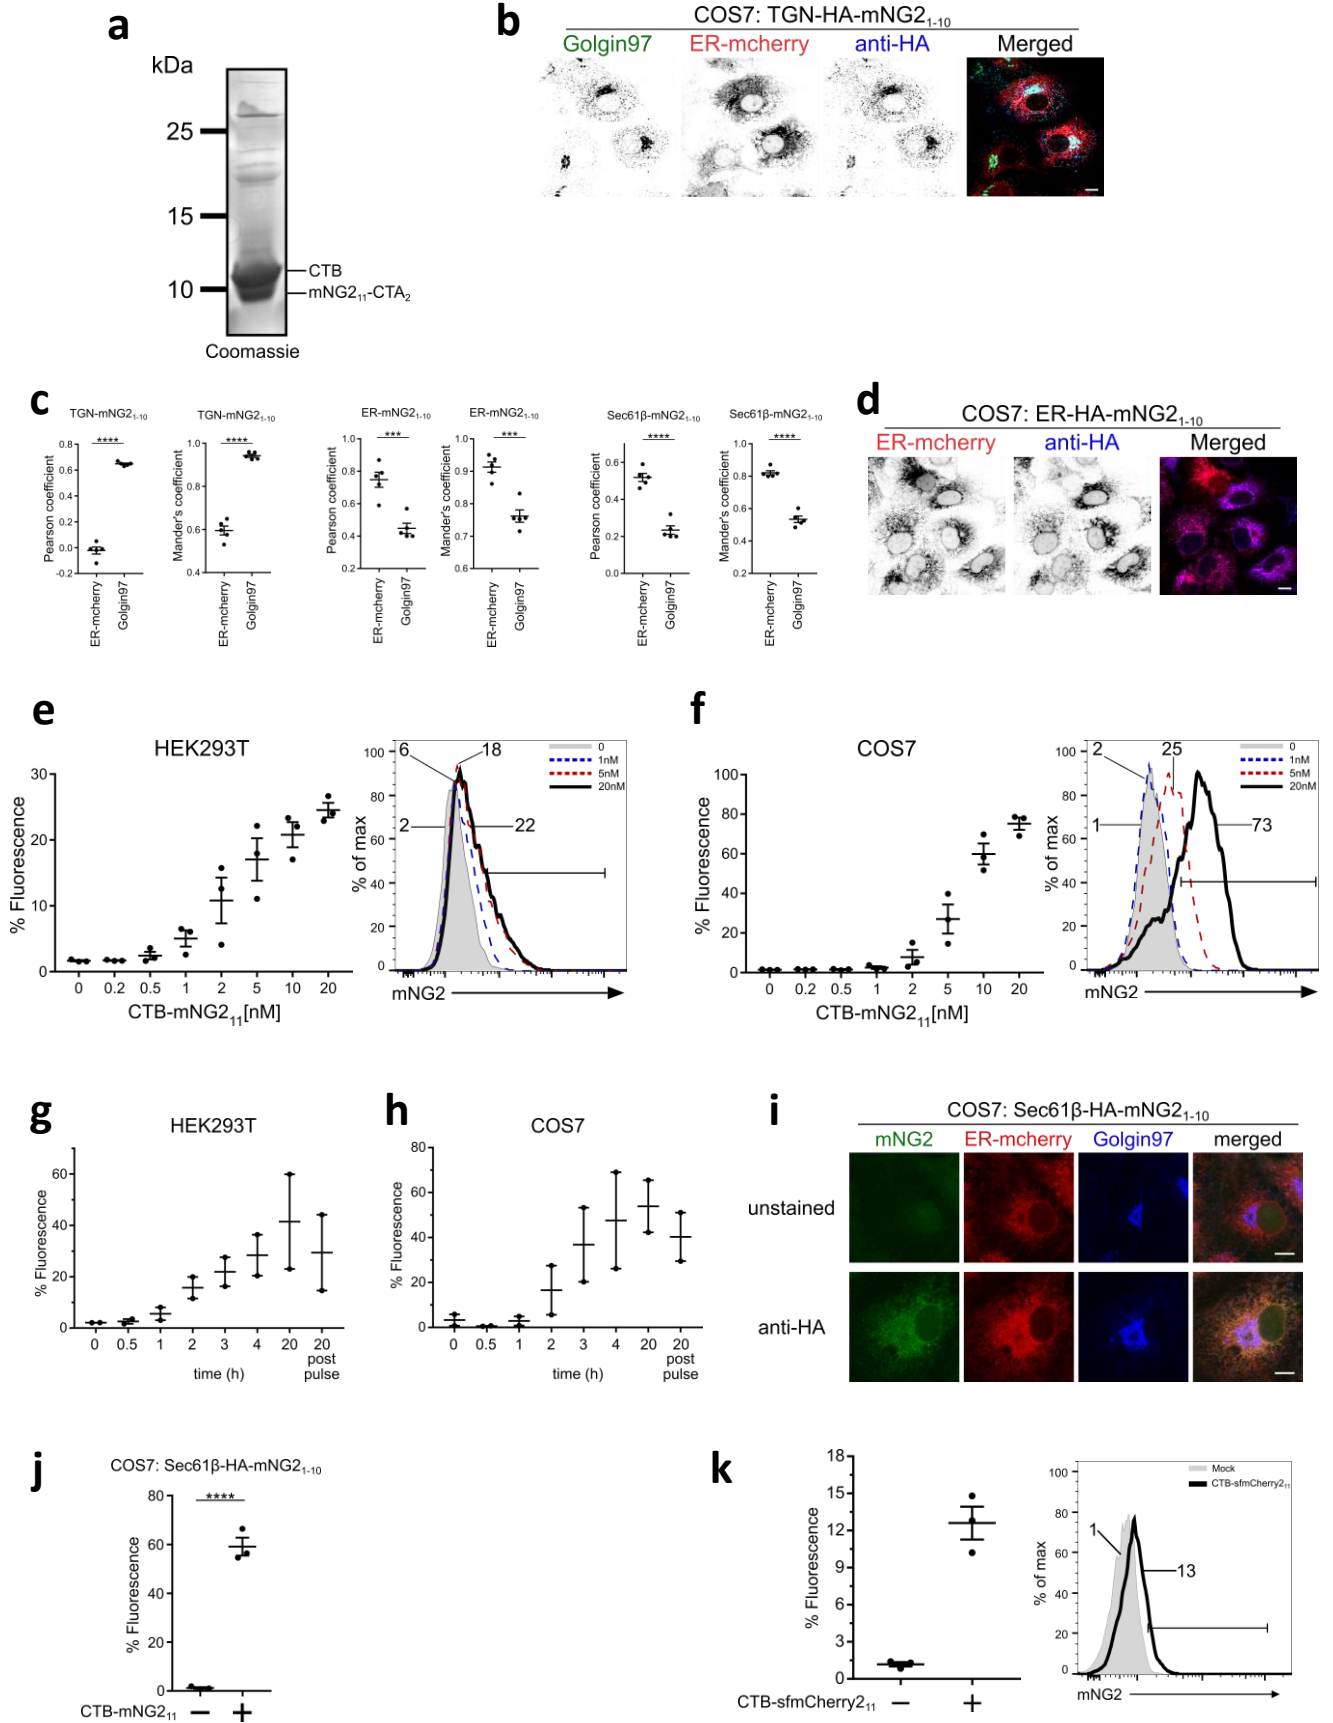

## Supplementary Figure 1.

Retrograde trafficking of CTB-mNG2<sub>11</sub> from the plasma membrane to the ER. **a** Coomassie stained gel of recombinant purified CTB-mNG2<sub>11</sub>. **b** Confocal microscopy of HA-tagged split neon green 2 (HA-mNG2<sub>1-10</sub>) to trans-Golgi (TGN-HA-mNG2<sub>1-10</sub>) in COS7. TGN is marked by immunocytochemistry of Golgin97 and ER is marked by expression of luminal ER-mCherry. Anti-HA detects the split HA-mNG2<sub>1-10</sub> constructs. **c** Pearson's and Mander's coefficient calculations for TGN-HA-mNG2<sub>1-10</sub>, ER-HA-mNG2<sub>1-10</sub> and Sec61 $\beta$ -HA-mNG2<sub>1-10</sub> with ER-mcherry and Golgin97. n=5 individual images. **d** Confocal performed as in **b** but with ER-HA-mNG2<sub>1-10</sub>. **e, f** Retrograde trafficking in HEK293T and COS7 cells expressing ER-HA-mNG2<sub>1-10</sub>. Cells were treated with indicated concentrations of CTB-mNG2<sub>11</sub> for 4 hours at 37°C. Representative flow cytometry graph is displayed highlighting CTB-mNG2<sub>11</sub> concentrations at 0, 1nM, 5nM and 20nM. n=3 independent experiments each performed with 3 biologic replicates and mean marked as one point for each dose. **g, h** Flow cytometry time course of retrograde trafficking into the ER in HEK293T and COS7 cells with CTB-mNG2<sub>11</sub>, respectively. Cells were treated with 10nM CTB-mNG2<sub>11</sub> continuously at 0, 0.5, 1, 2, 4, 20-hour and a condition where cells were treated with a 2-hour toxin pulse and chase for a total of 20 hours. n=2 independent experiments with 3 biological replicates per experiment. CT-1XmNG2<sub>11</sub> CT-2X mNG2<sub>11</sub> CT-5XmNG2<sub>11</sub>. **i** Confocal images as in **b** but with Sec61 $\beta$ -HA-mNG2<sub>1-10</sub>. **j** PM-ER retrograde trafficking in COS7 cells stably expressing Sec61 $\beta$ -HA-mNG2<sub>1-10</sub> incubated for 5 hours with 20nM CTB-mNG2<sub>11</sub>. n=3 independent experiments. **k** Retrograde trafficking of CTB-sfmCherry2<sub>11</sub> in K562 cells stably expressing trans-Golgi localized sfmCherry2<sub>1-10</sub>. Cells were incubated with 20nM CTB-sfmCherry2<sub>11</sub> for 5 hours at 37°C. n=3 independent experiments. Error bars indicate  $\pm$  SEM. Scale bars are 10 $\mu$ m.

# Supplementary Figure 2

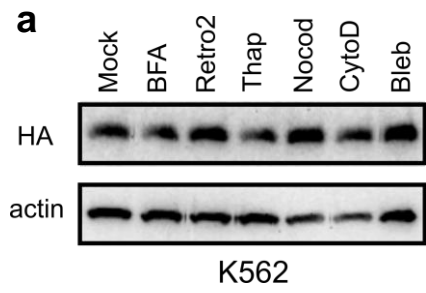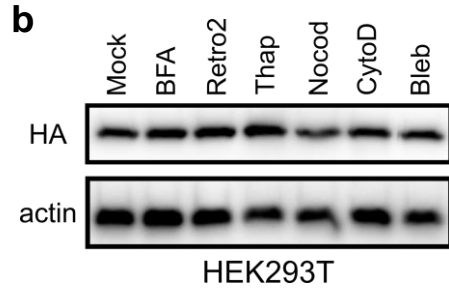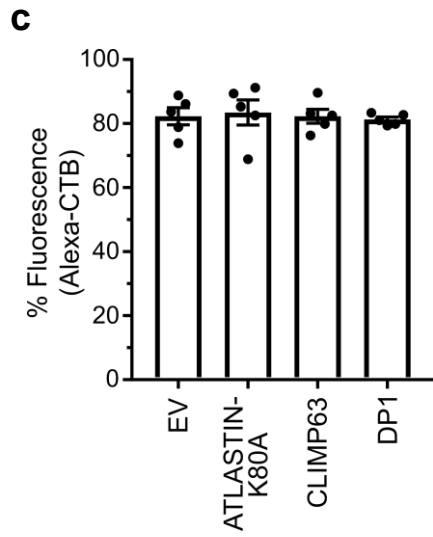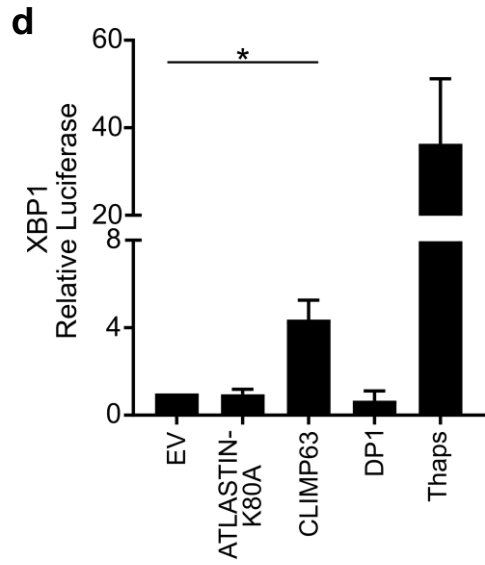

## Supplementary Figure 2.

Toxin binding and XBP1 stress response to ER shape gene expression. **a, b** Immunoblots for ER-HA-mNG2<sub>1-10</sub> in K562 (a) and HEK293T (b) cells treated or not with the indicated compounds used as above. Immunoblots for  $\beta$ -actin provide loading controls. **c** Binding control experiment displays equal loading of CTB-Alexa Fluor 488 in HEK293T cells expressing empty vector (EV), and ER shape genes ATLASTIN1-K80A, CLIMP63 and DP1. Cells were incubated with 2nM CTB-Alexa Fluor 488 for 5 hours 37°C, and then harvested and assayed by flow cytometry. n=5 independent experiments. **d** XBP1 luciferase reporter assay in cells expressing vector (EV), and ER shape genes ATLASTIN1-K80A, CLIMP63 and DP1. Cells were treated with thapsigargin (Thaps) at 300nM for 4 hours as positive control to induce ER stress. Graph displays average of n=3 independent experiments. Error bars indicate  $\pm$  SEM, \*p<0.05.

# Supplementary Figure 3

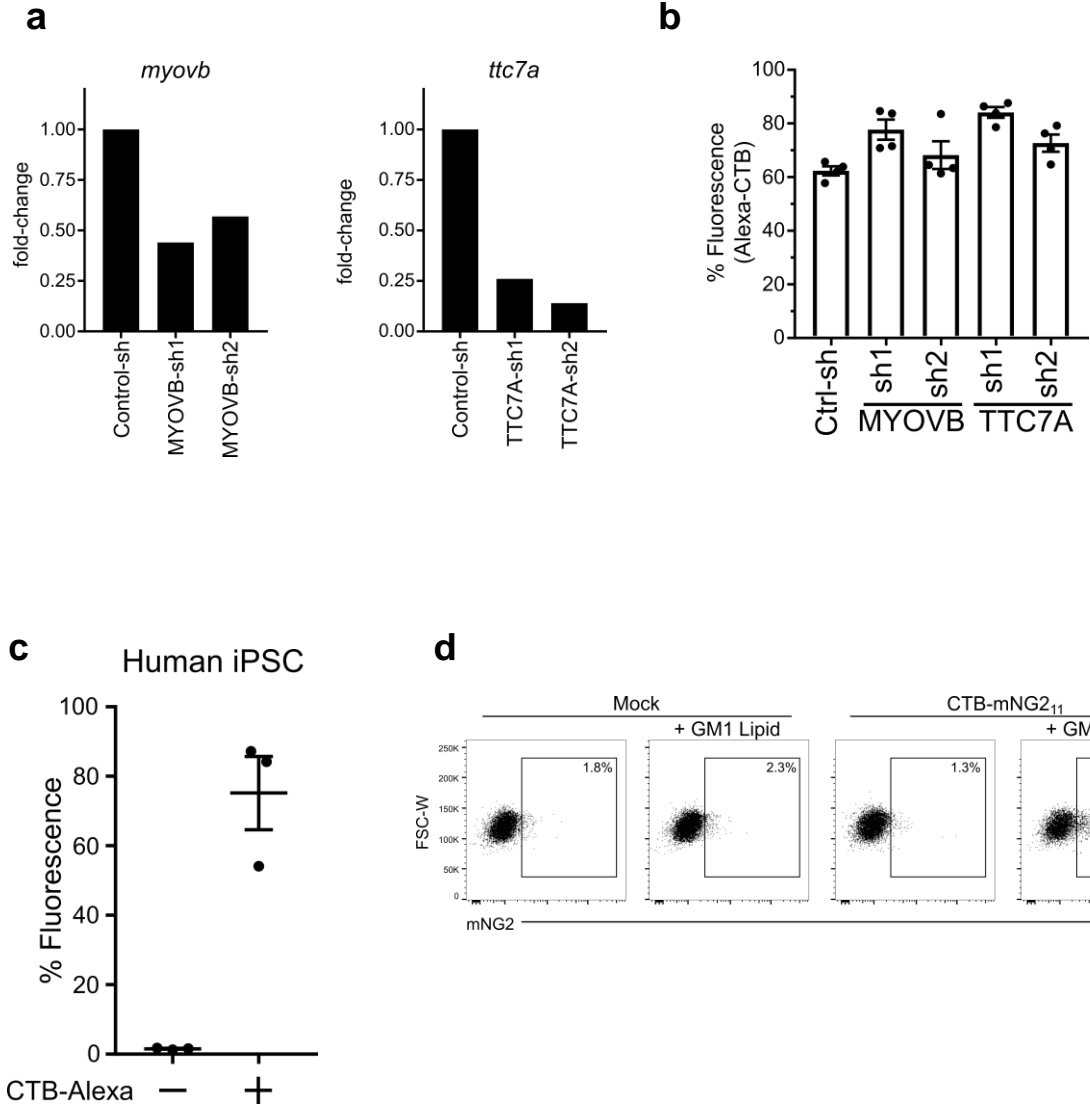

### **Supplementary Figure 3.**

mRNA expression and toxin binding CTB-Alexa Fluor 488 in cells with knockdown of monogenic disease genes. **a** Relative mRNA expression to control by qPCR of MYOVB and TTC7A in HEK293T cells expressing shRNA against indicated gene. Actin is used as expression control. **b** Binding control experiment displays equal loading of CTB-Alexa Fluor 488 in HEK293T expressing control shRNA or shRNA targeting MYOVB or TTC7A. Cells were incubated with 2nM CTB-Alexa Fluor 488 for 5 hours 37°C, and then harvested and assayed by flow cytometry. **c** CTB-Alexa Fluor 488 binding controls for human iPSCs loaded with GM1 C12:0 lipid, Incubation conditions same as above. n=3 independent experiments. **d** Representative flow cytometry graph from Fig 3e. Error bars indicate  $\pm$  SEM.

| Supplementary Table 1 :     | Sequence of split-FP constructs                                                                                                                                                                                                                                                                                                                                                                                                                                                                                                                                                                                                                                                                                                                                                                                                                                                                                                                                                                                                             |
|-----------------------------|---------------------------------------------------------------------------------------------------------------------------------------------------------------------------------------------------------------------------------------------------------------------------------------------------------------------------------------------------------------------------------------------------------------------------------------------------------------------------------------------------------------------------------------------------------------------------------------------------------------------------------------------------------------------------------------------------------------------------------------------------------------------------------------------------------------------------------------------------------------------------------------------------------------------------------------------------------------------------------------------------------------------------------------------|
| CTA2-sfmcherry211           | TACACCATCGTGGAGCAGTACGAGAGAGCCGAGGCCAGACACAGCACCCGGAGG<br>TGGAGGTTCCCTCGATGAGTAATACTTGGCGATGAAAAACCCAAAGTCTAGGTGTA<br>AAATTCCTTGACGAATACCAATCTAAAGTTAAAAGACAAATATTTTCAGGCTATCA<br>ATCTGATATTGATACACATAATAGAATTAAGGATGAATTA                                                                                                                                                                                                                                                                                                                                                                                                                                                                                                                                                                                                                                                                                                                                                                                                                  |
| CTA2-mNG2 11                | ACCGAGCTCAACTTCAAGGAGTGGCAAAAGGCCCTTTACCGATATGATGGGAGGT<br>GGAGGTTCCCTCGATGAGTAATACTTGGCGATGAAAAACCCAAAGTCTAGGTGTAA<br>AATTCCTTGACGAATACCAATCTAAAGTTAAAAGACAAATATTTTCAGGCTATCAAT<br>CTGATATTGATACACATAATAGAATTAAGGATGAATTA                                                                                                                                                                                                                                                                                                                                                                                                                                                                                                                                                                                                                                                                                                                                                                                                                  |
| ER-HA-mNG2 1-10             | ATGGGATGGAGCTGTATCATCCTCTTCTTGGTAGCAACAGCTACAGGCCGCGCAC<br>TCCGGAGAACAGAAGCTGATCTCAGAGGAGGACCTGGGAGGTATGGTGAGCAA<br>GGGTGAGGAGGATAACATGGCCTCTCTCCCAGCGACTCATGAGTTACACATCTTT<br>GGCTCCATCAACGGTGTGGACTTTGACATGGTGGGTCAGGGTACCGGCAATCCA<br>AATGATGGTTATGAGGAGTTAAACCTGAAGTCCACCAAGGGTGACCTCCAGTTCT<br>CCCCCTGGATTCTGGTCCCTCATATCGGGTATGGCTTCCATCAGTACCTGCCCTA<br>CCCTGACGGGATGTCGCCTTTCCAGGCCGCCATGGTAGATGGCTCCGGATACCA<br>AGTCCATCGCACAATGCAGTTTGAAGATGGTGCCTCCCTTACTGTAACTACCGC<br>TACACCTACGAGGGAAGCCACATCAAAGGAGAGGCCAGGTGATGGGGACTGG<br>TTTCCCTGCTGACGGTCTGTGATGACCAACACGCTGACCGCTGCGGACTGGTG<br>CATGTCGAAGAAGACTTACCCCAACGACAAAACCATCATCAGTACCTTTAAGTGG<br>AGTTACACCACTGTAAATGGCAAACGCTACCGGAGCACTGCGCGGACCACCTAC<br>ACCTTTGCCAAGCCAATGGCGGCTAACTATCTGAAGAACCAGCCGATGTACGTGT<br>TCCGTAAGACGGAGCTCAAGCACTCCATGGGAGAGAAGGATGAACTG                                                                                                                                                                                                         |
| TGN-HA-mNG2 1-10            | ATGAGGCTTCGGGAGCCGCTCCTGAGCGGCAGCGCCGCGATGCCAGGCCGCGT<br>CCTACAGCGGGCCTGCCGCTGCTCGTGGCCGCTGCGCTCTGCACCTTGGCG<br>TCACCCTCGTTTACTACCTGGCTGGCCGCGACCTGAGCCGCCTGCCCAACTGG<br>TCGGAGTCTCCACACCGCTGCAGGGCGGCTCGAACAGTGCCGCGGCCATCGGG<br>CAGTCCCTCCGGGGAGCTCCGGACCGGAGGGGCCAAGGATCCACCGGTGCGCCAC<br>CTACCCATACGATGTTCCAGATTACGCTGGAGGTATGGTGAGCAAGGGTGAGGA<br>GGATAACATGGCCTCTCTCCCAGCGACTCATGAGTTACACATCTTTGGCTCCATC<br>AACGGTGTGGACTTTGACATGGTGGGTCAGGGTACCGGCAATCCAATGATGGT<br>TATGAGGAGTTAAACCTGAAGTCCACCAAGGGTGACCTCCAGTTCTCCCCCTGG<br>ATTCTGGTCCCTCATATCGGGTATGGCTTCCATCAGTACCTGCCCTACCCTGACG<br>GGATGTCGCCTTTCCAGGCCGCCATGGTAGATGGCTCCGGATACCAAGTCCATC<br>GCACAATGCAGTTTGAAGATGGTGCCTCCCTTACTGTAACTACCGCTACACCTA<br>CGAGGGAAGCCACATCAAAGGAGAGGCCAGGTGATGGGGACTGGTTTTCCCTG<br>CTGACGGTCTGTGATGACCAACACGCTGACCGCTGCGGACTGGTGCATGTGCA<br>AGAAGACTTACCCCAACGACAAAACCATCATCAGTACCTTTAAGTGGAGTTACAC<br>CACTGTAAATGGCAAACGCTACCGGAGCACTGCGCGGACCACCTACACCTTTGC<br>CAAGCCAATGGCGGCTAACTATCTGAAGAACCAGCCGATGTACGTGTTCCGTAA<br>GACGGAGCTCAAGCACTCCATG |
| Sec61 $\beta$ -HA-mNG2 1-10 | ATGCCTGGTCCGACCCCAAGTGGCACTAACGTGGGATCCTCAGGGCGCTCTCCC<br>AGCAAAGCAGTGGCCGCCCGGGCGGGGATCCACTGTCCGGCAGAGGAAAA<br>TGCCAGCTGTGGGACAAGGAGTGCAGGCCGCACAACCTCGGCAGGCACCGGGG<br>GGATGTGGCGATTCTACACAGAAGATTCACCTGGGCTCAAAGTTGGCCCTGTTC                                                                                                                                                                                                                                                                                                                                                                                                                                                                                                                                                                                                                                                                                                                                                                                                             |



|                                                    |                                                                                                                                                                                                                                                                                                                                                                                                                                                                                                                                                                                                                                                                                                                                                                                                                                                                                                                                                                                                                              |
|----------------------------------------------------|------------------------------------------------------------------------------------------------------------------------------------------------------------------------------------------------------------------------------------------------------------------------------------------------------------------------------------------------------------------------------------------------------------------------------------------------------------------------------------------------------------------------------------------------------------------------------------------------------------------------------------------------------------------------------------------------------------------------------------------------------------------------------------------------------------------------------------------------------------------------------------------------------------------------------------------------------------------------------------------------------------------------------|
|                                                    | <p>CAGTATTGGTTATGAGTCTTCTGTTTCATCGCTTCTGTATTTATGTTGCACATTTGG<br/> GGCAAGTACACTCGTTCGGGAGGAGGATACCCATACGATGTTCCAGATTACGCT<br/> ATGGTGAGCAAGGGTGAGGAGGATAACATGGCCTCTCTCCCAGCGACTCATGAG<br/> TTACACATCTTTGGCTCCATCAACGGTGTGGACTTTGACATGGTGGGTCAGGGTA<br/> CCGGCAATCCAAATGATGGTTATGAGGAGTTAAACCTGAAGTCCACCAAGGGTG<br/> ACCTCCAGTTCTCCCCCTGGATTCTGGTCCCTCATATCGGGTATGGCTTCCATCA<br/> GTACCTGCCCTACCCTGACGGGATGTCGCCTTTCCAGGCCGCCATGGTAGATGG<br/> CTCCGGATACCAAGTCCATCGCACAATGCAGTTTGAAGATGGTGCCTCCCTTACT<br/> GTTAACTACCGCTACACCTACGAGGGAAGCCACATCAAAGGAGAGGCCAGGTG<br/> ATGGGGACTGGTTTCCCTGCTGACGGTCTGTGATGACCAACACGCTGACCGCT<br/> GCGGACTGGTGCATGTGGAAGAAGACTTACCCCAACGACAAAACCATCATCAGT<br/> ACCTTTAAGTGGAGTTACACCACTGTAAATGGCAAACGCTACCGGAGCACTGCG<br/> CGGACCACCTACACCTTTGCCAAGCCAATGGCGGCTAACTATCTGAAGAACCAG<br/> CCGATGTACGTGTTCCGTAAGACGGAGCTCAAGCACTCCATG</p>                                                                                                                                                            |
| <p>TGN-<br/>FLAG-<br/>sfmche<br/>rry21-<br/>10</p> | <p>ATGCGCCTTAGAGAGCCATTGCTTTCAGGCTCAGCTGCCATGCCGGGTGCATCC<br/> TTGCAACGGGCTTGTGCTTGTGGTGCAGTGTGCGCACTGCATCTTGGTGTG<br/> ACGCTCGTATATACTTGGCCGGGCGCGACTTGAGTCGACTGCCACAGTTGGTA<br/> GGGGTAAGCACCCATTGCAGGGCGGGTCTAATTCAGCGGCTGCGATTGGCCA<br/> GTCTTCAGGGGAAGTGAAGACGGGAGGTGCTGATTATAAAGATGACGATGACAA<br/> AATGGAAGAAGACAATATGGCCATAATCAAGGAGTTCATGAGGTTCAAGGTTTCA<br/> ATGGAAGGTAGTGTGAACGGGCATGAGTTTGAATCGAGGGAGAGGGCGAGGG<br/> GCACCCTTATGAGGGTACCCAGACGGCCAAATTGAAGGTAACAAAAGGGGGGCC<br/> ACTTCCCTTTCGCATGGGATATACTCAGCCCCCAGTTTATGTATGGTTCTAAGGCTT<br/> ATGTAAAACATCCGGCTGACATACCCGATTATCTCAAGCTCTCATTCCCCGAGGG<br/> CTTTACTTGGGAGCGGGTGTGAATTTGAAGATGGAGGAGTGGTTACGGTTAC<br/> GCAGGACAGTTCTTCAAGACGGGCAATTCATTTACAAAGTTAACTCCTCGGG<br/> ATAAACTTCCCTAGTGTATGGCCCTGTCATGCAGAAGAAGACTATGGGGTGGGAA<br/> GCCAGCACGGAGAGGATGTATCCGGAGGATGGTGCCTTGAAAGGTGAGATCAAC<br/> CAACGCCTCAAGCTCAAAGATGGTGGACACTATGATGCCGAGGTTAAGACCACC<br/> TATAAAGCCAAGAAACCGGTCCAGCTCCCCGGTGCATACAACGTTGATATAAAGC<br/> TCGATATAACATCTCACAATGAGGAC</p> |
| <p>CTA1-<br/>(EE/D<br/>D)-<br/>1XmN<br/>G2</p>     | <p>AATGATGATAAGTTATATCGGGCAGATTCTAGACCTCCTGATGAAATAAAGCAGT<br/> CAGGTGGTCTTATGCCAAGAGGACAGAGTGAGTACTTTGACCGAGGTACTIONCAA<br/> GAATATCAACCTTTATGATCATGCAAGAGGAACTCAGACGGGATTTGTTAGGCAC<br/> GATGATGGATATGTTTCCACCTCAATTAGTTTGAAGTGGCCACTTAGTGGGTC<br/> AACTATATTGTCTGGTCACTTACTTATTATATATATGTTATAGCCACTGCACCCA<br/> ACATGTTTAAACGTTAATGATGTATTAGGGGCATACAGTCCTCATCCAGATGACCAA<br/> GACGTTTCTGCTTTAGGTGGGATTCCATACTCCCAAATATATGGATGGTATCGAG<br/> TTCATTTTGGGGTGCCTTATGAACAATTACATCGTAATAGGGGCTACAGAGATAG<br/> ATATTACAGTAACTTAGATATTGCTCCAGCTGCAGATGGTTATGGATTGGCAGGTT<br/> TCCCTCCGGAGCATAGAGCTTGGAGGGAAGAGCCGTGGATTATCATGCACCGC<br/> CGGGTTGTGGGAATGCTGGTGGAGGAGGTGGAACCGAGCTCAACTTCAAGGAG<br/> TGGCAAAGGCCTTTACCGATATGATG</p>                                                                                                                                                                                                                                                                                               |
| <p>CTA1-<br/>(EE/D<br/>D)-<br/>2XmN<br/>G2</p>     | <p>AATGATGATAAGTTATATCGGGCAGATTCTAGACCTCCTGATGAAATAAAGCAGT<br/> CAGGTGGTCTTATGCCAAGAGGACAGAGTGAGTACTTTGACCGAGGTACTIONCAA<br/> GAATATCAACCTTTATGATCATGCAAGAGGAACTCAGACGGGATTTGTTAGGCAC<br/> GATGATGGATATGTTTCCACCTCAATTAGTTTGAAGTGGCCACTTAGTGGGTC<br/> AACTATATTGTCTGGTCACTTACTTATTATATATATGTTATAGCCACTGCACCCA<br/> ACATGTTTAAACGTTAATGATGTATTAGGGGCATACAGTCCTCATCCAGATGACCAA<br/> GACGTTTCTGCTTTAGGTGGGATTCCATACTCCCAAATATATGGATGGTATCGAG</p>                                                                                                                                                                                                                                                                                                                                                                                                                                                                                                                                                                                |

|                                     |                                                                                                                                                                                                                                                                                                                                                                                                                                                                                                                                                                                                                                                                                                                                                                                                                                                                                                              |
|-------------------------------------|--------------------------------------------------------------------------------------------------------------------------------------------------------------------------------------------------------------------------------------------------------------------------------------------------------------------------------------------------------------------------------------------------------------------------------------------------------------------------------------------------------------------------------------------------------------------------------------------------------------------------------------------------------------------------------------------------------------------------------------------------------------------------------------------------------------------------------------------------------------------------------------------------------------|
|                                     | TTCATTTTGGGGTGCTTGATGAACAATTACATCGTAATAGGGGCTACAGAGATAG<br>ATATTACAGTAACTTAGATATTGCTCCAGCTGCAGATGGTTATGGATTGGCAGGTT<br>TCCCTCCGGAGCATAGAGCTTGGAGGGAAGAGCCGTGGATTTCATCATGCACCGC<br>CGGGTTGTGGGAATGCTGGTGGTTCTGGAGGAACCGAGCTCAACTTCAAGGAGT<br>GGCAAAGGCCTTTACCGATATGATGGGCAGCGCAGGAGGGACTGAATTAATT<br>TTAAGAATGGCAGAAAGCATTCACTGACATGATG                                                                                                                                                                                                                                                                                                                                                                                                                                                                                                                                                                       |
| CTA1-<br>(EE/D<br>D)-<br>5XmN<br>G2 | AATGATGATAAGTTATATCGGGCAGATTCTAGACCTCCTGATGAAATAAAGCAGT<br>CAGGTGGTCTTATGCCAAGAGGACAGAGTGAGTACTTTGACCGAGGTTACTCAAAT<br>GAATATCAACCTTTATGATCATGCAAGAGGAACTCAGACGGGATTTGTTAGGCAC<br>GATGATGGATATGTTTCCACCTCAATTAGTTTGAGAAGTGCCCACTTAGTGGGTC<br>AACTATATTGTCTGGTCATTCTACTTATTATATATATGTTATAGCCACTGCACCCA<br>ACATGTTTAAACGTTAATGATGTATTAGGGGCATACAGTCCTCATCCAGATGACCAA<br>GACGTTTCTGCTTTAGGTGGGATTCCATACTCCCAAATATATGGATGGTATCGAG<br>TTCATTTTGGGGTGCTTGATGAACAATTACATCGTAATAGGGGCTACAGAGATAG<br>ATATTACAGTAACTTAGATATTGCTCCAGCTGCAGATGGTTATGGATTGGCAGGTT<br>TCCCTCCGGAGCATAGAGCTTGGAGGGAAGAGCCGTGGATTTCATCATGCACCGC<br>CGGGTTGTGGGAATGCTGGTGGTtctGGAGGAACCGAGCTCAACTTCAAGGAGTG<br>GCAAAGGCCTTTACCGATATGATGGGCtctggaAGCGGGACTGAATTAATTTTAA<br>AGAATGGCAGAAAGCATTCACTGACATGATGGGagcaggtggatcaACaGAGCTaAAC<br>TTAAGGAaTGGCAAAGGCtTTTACaGATATGATGggtgggtctgcaggaACgGAGCTgA<br>AtTTCAAaGAGTGGCAgAAGGCCTTTACgGAcATGATG |

| <b>Supplementary Table2:</b> | <b>shRNA and qPCR oligo sequences</b>                        |
|------------------------------|--------------------------------------------------------------|
| MYOVB<br>shRNA-1<br>Forward  | TTTgcggtgttacagccgatgatTTCAAGAGAtcatcggctgtaacacgcTTTTTA     |
| MYOVB<br>shRNA-1<br>Reverse  | AGCTTAAAAAgcggtgttacagccgatgatTCTCTTGAAatcatcggctgtaacacg    |
| MYOVB<br>shRNA-2<br>Forward  | TTTgatgggtgattcctgtagtataTTCAAGAGAtatactacaggaatcacatcTTTTTA |
| MYOVB<br>shRNA-2<br>Reverse  | AGCTTAAAAAgatgggtgattcctgtagtataTCTCTTGAAatactacaggaatcacat  |
| TTC7A shRNA-<br>1 Forward    | TTTgcaagatgaattgcaccggAATTCAAGAGATTcgggtgcaattcatcttgcTTTTTA |
| TTC7A shRNA-<br>1 Reverse    | AGCTTAAAAAgcaagatgaattgcaccggAATCTCTTGAATTcgggtgcaattcatcttg |
| TTC7A shRNA-<br>2 Forward    | TTTgcgtttgagaatttcaccttTTCAAGAGAAaggtgaaattctcaaacgcTTTTTA   |
| TTC7A shRNA-<br>2 Reverse    | AGCTTAAAAAgcgtttgagaatttcaccttTCTCTTGAAaaggtgaaattctcaaacg   |
| TTC7A qPCR<br>Primer Forward | CATCTATGACCTCCTGAGCATC                                       |
| TTC7A qPCR                   | CTGACTTCCCACAAGCCA                                           |

|                              |                       |
|------------------------------|-----------------------|
| Primer Reverse               |                       |
| MYOVB qPCR<br>Primer Forward | TGCTGAGTGACCTTTCCATTC |
| MYOVB qPCR<br>Primer Reverse | CCAGATAGACCCTGAATGCTC |
